# Supplementary material for: Recent developments in tetrathiafulvalene and dithiafulvalene based metal-free organic sensitizers for dye-sensitized solar cells: a mini-review
Source: Royal Society of Chemistry journal article supplement (doi:10.1039/c7se00068e), 2017-01-01
Supplement: c7se00068e1.pdf [file c7se00068e1.pdf]

## Supporting Information

### **Recent Developments in Tetrathiafulvalene and Dithiafulvalene based Metal-Free Organic Sensitizers for Dye-sensitized solar cells: A Mini Review**

Naresh Duvva,<sup>a</sup> Ushasri Chilakamarthi<sup>a</sup> and Lingamallu Giribabu\*<sup>a</sup>

Inorganic & Physical Chemistry Division, CSIR-Indian Institute of Chemical Technology and CSIR-Network of Institutes for Solar Energy (CSIR-NISE), Tarnaka, Hyderabad 500007, India. Email: giribabu@iict.res.in, Fax: +91-40-27160921.

**Table 1: electronic life time**

| Dye | $\tau_e$                                                                                                                                                                                                                                                                                                                                                                                                     | REFERENCE |
|-----|--------------------------------------------------------------------------------------------------------------------------------------------------------------------------------------------------------------------------------------------------------------------------------------------------------------------------------------------------------------------------------------------------------------|-----------|
| T1  | 2.3 ms                                                                                                                                                                                                                                                                                                                                                                                                       | 54        |
| T2  | 256us                                                                                                                                                                                                                                                                                                                                                                                                        | 54        |
| T3  | 494us                                                                                                                                                                                                                                                                                                                                                                                                        | 54        |
| T4  | -----                                                                                                                                                                                                                                                                                                                                                                                                        | 55        |
| T5  | -----                                                                                                                                                                                                                                                                                                                                                                                                        | 59        |
| T6  | -----                                                                                                                                                                                                                                                                                                                                                                                                        | 59        |
| T7  | -----                                                                                                                                                                                                                                                                                                                                                                                                        | 59        |
| T8  | -----                                                                                                                                                                                                                                                                                                                                                                                                        | 59        |
| T9  | -----                                                                                                                                                                                                                                                                                                                                                                                                        | 60        |
| T10 | -----                                                                                                                                                                                                                                                                                                                                                                                                        | 60        |
| T11 | -----                                                                                                                                                                                                                                                                                                                                                                                                        | 60        |
| T12 | <div data-bbox="511 1096 990 1501" data-label="Figure"> </div> <p>Electron lifetime (<math>\tau</math>) as a function of <math>V_{oc}</math> for DSSCs sensitized with G1-G6. Electron lifetime was measured by means of intensity-modulated photovoltage spectroscopy.</p> <p>T12 and T13 Electronic Lifetime Order :T13&gt;T12</p> <p>T14-T17 Electronic Lifetime Order:T15 &gt; T14 &gt; T17 &gt; T16</p> | 56        |
| T13 |                                                                                                                                                                                                                                                                                                                                                                                                              | 56        |
| T14 |                                                                                                                                                                                                                                                                                                                                                                                                              | 56        |
| T15 |                                                                                                                                                                                                                                                                                                                                                                                                              | 56        |
| T16 |                                                                                                                                                                                                                                                                                                                                                                                                              | 56        |
| T17 |                                                                                                                                                                                                                                                                                                                                                                                                              | 56        |

## Thermal stability

T12-T17: The advantage of this invention is that these classes of sensitizers are thermally stable up to 200 °C to 250 °C, which is one of the requisite of DSSC technology.

TG/DTG Curves of T12-T17 with a heating rate of 10 °C min<sup>-1</sup> under nitrogen atmosphere.

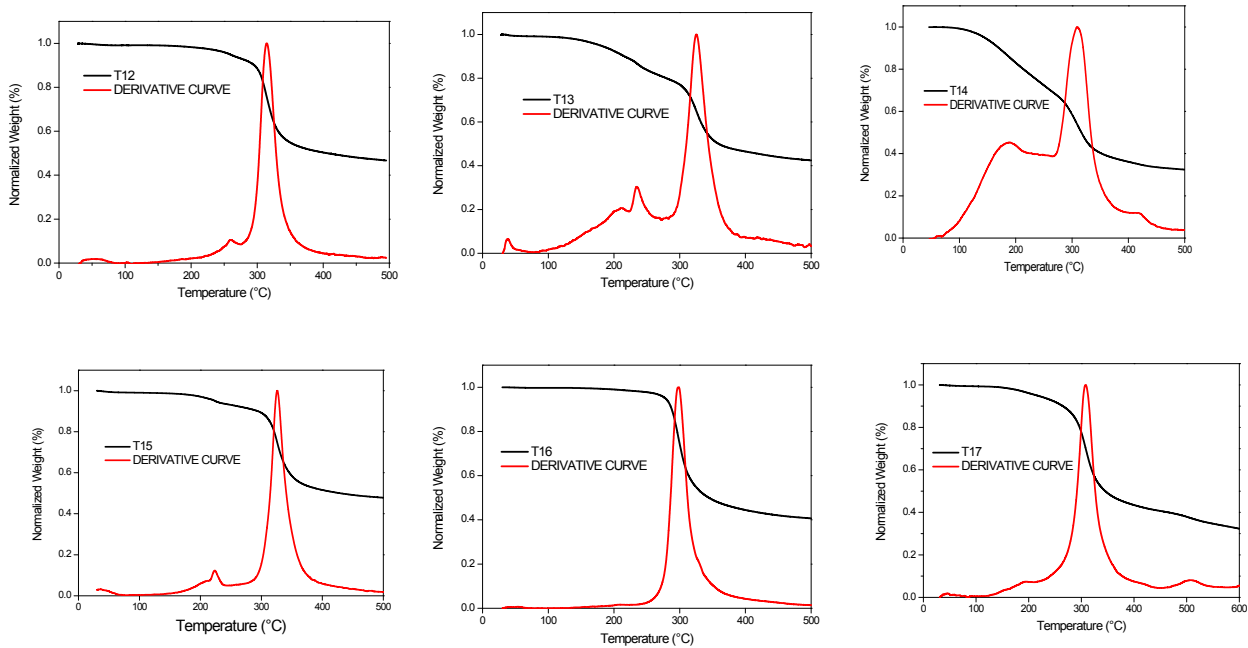

Thermal stability of dyes, which are essential for roof top applications. It is known in literature that tetrathiafulvalene derivatives are thermally stable. We have carried out thermogravimetric analysis of all dyes it is apparent that the thermal behaviour of **T12** and **T13** are stable up to 250 °C, **T14** and **T15** are stable up to 200 °C, whereas **T16** and **T17** are stable up to 260 °C. The initial weight loss between 200 to 260 °C (5.20%) is due to the removal moisture. Among metal-free organic sensitizers based DSSC, tetrathiafulvalene based molecules are thermally stable and probable candidates for rooftop applications. the similar trend in thermal stability of remaining sensitizers. It is clear from the thermal data that these dyes are highly durable for long standing outdoor applications.

**Table 2: electronic life time**

| Dye | $\tau_e$                                                                                                                                                                                                                                                                                                                                                                                                                                                                                                                                                                                                                                                                                                                                                                                                                                                                                                                                                                                                                                                                                                                                                                          | Ref. |
|-----|-----------------------------------------------------------------------------------------------------------------------------------------------------------------------------------------------------------------------------------------------------------------------------------------------------------------------------------------------------------------------------------------------------------------------------------------------------------------------------------------------------------------------------------------------------------------------------------------------------------------------------------------------------------------------------------------------------------------------------------------------------------------------------------------------------------------------------------------------------------------------------------------------------------------------------------------------------------------------------------------------------------------------------------------------------------------------------------------------------------------------------------------------------------------------------------|------|
| D1  | 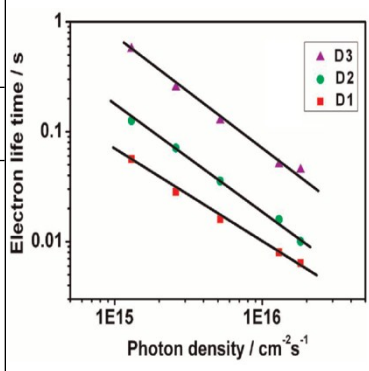 <p>The electron lifetimes of the three sensitizers are positively correlated with their <math>\pi</math>-bridge lengths. In particular, D3 has the longest <math>\pi</math>-bridge and hence holds the longest electron lifetime which is almost 10-fold higher than that of D1. This result shows that for the sensitizer series studied here the electron lifetime is mainly determined by the recombination with the contiguous electrolyte as commonly believed. Plausibly, with the increasing length of the <math>\pi</math>-bridge, it would become increasingly more difficult for the injected electron in the <math>\text{TiO}_2</math> CB to recombine with the redox electrolyte due to the formation of a thicker dye block layer. Additionally, electron recombination with the photo-oxidized adsorbed sensitizers could also be decreased with increasing <math>\pi</math>-bridge length simply due to the ionized HOMO being more spatially removed from the <math>\text{TiO}_2</math> substrate. This naturally explains the highest <math>V_{oc}</math> (0.83 V) for D3.</p> | 61   |
| D2  |                                                                                                                                                                                                                                                                                                                                                                                                                                                                                                                                                                                                                                                                                                                                                                                                                                                                                                                                                                                                                                                                                                                                                                                   | 61   |
| D3  |                                                                                                                                                                                                                                                                                                                                                                                                                                                                                                                                                                                                                                                                                                                                                                                                                                                                                                                                                                                                                                                                                                                                                                                   | 61   |
| D4  | 19.21 ms                                                                                                                                                                                                                                                                                                                                                                                                                                                                                                                                                                                                                                                                                                                                                                                                                                                                                                                                                                                                                                                                                                                                                                          | 62   |
| D5  | 16.18 ms                                                                                                                                                                                                                                                                                                                                                                                                                                                                                                                                                                                                                                                                                                                                                                                                                                                                                                                                                                                                                                                                                                                                                                          | 63   |
| D6  | 19.89 ms                                                                                                                                                                                                                                                                                                                                                                                                                                                                                                                                                                                                                                                                                                                                                                                                                                                                                                                                                                                                                                                                                                                                                                          | 63   |
| D7  | 19.15 ms                                                                                                                                                                                                                                                                                                                                                                                                                                                                                                                                                                                                                                                                                                                                                                                                                                                                                                                                                                                                                                                                                                                                                                          | 64   |
| D8  | 24.88 ms                                                                                                                                                                                                                                                                                                                                                                                                                                                                                                                                                                                                                                                                                                                                                                                                                                                                                                                                                                                                                                                                                                                                                                          | 64   |
| D9  | -----                                                                                                                                                                                                                                                                                                                                                                                                                                                                                                                                                                                                                                                                                                                                                                                                                                                                                                                                                                                                                                                                                                                                                                             | 65   |
| D10 | -----                                                                                                                                                                                                                                                                                                                                                                                                                                                                                                                                                                                                                                                                                                                                                                                                                                                                                                                                                                                                                                                                                                                                                                             | 65   |
| D11 | -----                                                                                                                                                                                                                                                                                                                                                                                                                                                                                                                                                                                                                                                                                                                                                                                                                                                                                                                                                                                                                                                                                                                                                                             | 65   |
| D12 | -----                                                                                                                                                                                                                                                                                                                                                                                                                                                                                                                                                                                                                                                                                                                                                                                                                                                                                                                                                                                                                                                                                                                                                                             | 65   |
| D13 | -----                                                                                                                                                                                                                                                                                                                                                                                                                                                                                                                                                                                                                                                                                                                                                                                                                                                                                                                                                                                                                                                                                                                                                                             | 65   |
| D14 | -----                                                                                                                                                                                                                                                                                                                                                                                                                                                                                                                                                                                                                                                                                                                                                                                                                                                                                                                                                                                                                                                                                                                                                                             | 65   |
| D15 | -----                                                                                                                                                                                                                                                                                                                                                                                                                                                                                                                                                                                                                                                                                                                                                                                                                                                                                                                                                                                                                                                                                                                                                                             | 65   |
| D16 | -----                                                                                                                                                                                                                                                                                                                                                                                                                                                                                                                                                                                                                                                                                                                                                                                                                                                                                                                                                                                                                                                                                                                                                                             | 66   |
| D17 | -----                                                                                                                                                                                                                                                                                                                                                                                                                                                                                                                                                                                                                                                                                                                                                                                                                                                                                                                                                                                                                                                                                                                                                                             | 66   |
| D18 |                                                                                                                                                                                                                                                                                                                                                                                                                                                                                                                                                                                                                                                                                                                                                                                                                                                                                                                                                                                                                                                                                                                                                                                   | 67   |
| D19 | The order of electron time ( $\tau_e$ ) would be in reverse with that of the peak frequency of lower-frequency range (f) in their devices. So D18 ~ 20 dyes display longer electron lifetime than that of DP-1 in their cells. The DSSC device of D21 with the longest electron lifetime demonstrates the best photovoltaic performance.                                                                                                                                                                                                                                                                                                                                                                                                                                                                                                                                                                                                                                                                                                                                                                                                                                          | 67   |
| D20 |                                                                                                                                                                                                                                                                                                                                                                                                                                                                                                                                                                                                                                                                                                                                                                                                                                                                                                                                                                                                                                                                                                                                                                                   | 67   |
